# Supplementary material
Source: publisher figshare collection journal article supplement (https://gsapubs.figshare.com/articles/dataset/_/16589987)
Supplement: Supplementary file 1 [file 1]

## Sheet: Sheet1
Table S1: Summary of P-T figures used in compilation of Fig. 2.
Reference	Composition	Details	System	Reference
A	Metapelite	Average pelite composition	NCKFMASH	Chunjing, W. E. I., & Wei, W. A. N. G. (2007). Phase Equilibria in the Process of Anatexis in High-grade Metapelites. Earth Science Frontiers, 14(1), 125-134.
B	Metapelite	Sub-aluminous pelite, Fig. 7	NCKFMASHTO	White, R. W., Powell, R., & Holland, T. J. B. (2007). Progress relating to calculation of partial melting equilibria for metapelites. Journal of metamorphic Geology, 25(5), 511-527.
C	Metagreywacke	Fig. 1	NCKFMASHTO	Johnson, T. E., White, R. W., & Powell, R. (2008). Partial melting of metagreywacke: a calculated mineral equilibria study. Journal of Metamorphic Geology, 26(8), 837-853.
D	Metagreywacke	Fig. 1	NCKFMASHTO	Johnson, T. E., White, R. W., & Powell, R. (2008). Partial melting of metagreywacke: a calculated mineral equilibria study. Journal of Metamorphic Geology, 26(8), 837-853.
E	Metagreywacke	Ivrea zone amphibolite	NCKFMASHTO	Redler, C., White, R. W., & Johnson, T. E. (2013). Migmatites in the Ivrea Zone (NW Italy): Constraints on partial melting and melt loss in metasedimentary rocks from Val Strona di Omegna. Lithos, 175, 40-53.
F	Metagreywacke	Ivrea zone lower granulite	NCKFMASHTO	Redler, C., White, R. W., & Johnson, T. E. (2013). Migmatites in the Ivrea Zone (NW Italy): Constraints on partial melting and melt loss in metasedimentary rocks from Val Strona di Omegna. Lithos, 175, 40-53.
G	Psammite	Ivrea zone upper granulite	NCKFMASHTO	Redler, C., White, R. W., & Johnson, T. E. (2013). Migmatites in the Ivrea Zone (NW Italy): Constraints on partial melting and melt loss in metasedimentary rocks from Val Strona di Omegna. Lithos, 175, 40-53.
H	Psammite	Average comp from Loch Coire migmatites and modern deep sea sands	NCKFMASHO	Kelsey, D. E., Clark, C., & Hand, M. (2008). Thermobarometric modelling of zircon and monazite growth in melt‐bearing systems: Examples using model metapelitic and metapsammitic granulites. Journal of Metamorphic Geology, 26(2), 199-212.
J	Diorite	Average diorite from Pitcher et al., 1985	NCKFMASHTO	Palin, R. M., White, R. W., Green, E. C., Diener, J. F., Powell, R., & Holland, T. J. (2016). High‐grade metamorphism and partial melting of basic and intermediate rocks. Journal of Metamorphic Geology, 34(9), 871-892.
K	Basalt	Enriched thoeleiitic basalt	NCKFMASHTO	Kendrick, J., & Yakymchuk, C. (2020). Garnet fractionation, progressive melt loss and bulk composition variations in anatectic metabasites: complications for interpreting the geodynamic significance of TTGs. Geoscience Frontiers, 11(3), 745-763.,Palin, R. M., White, R. W., Green, E. C., Diener, J. F., Powell, R., & Holland, T. J. (2016). High‐grade metamorphism and partial melting of basic and in…
L	Basalt	Depleted thoeleiitic basalt	NCKFMASHTO	Kendrick, J., & Yakymchuk, C. (2020). Garnet fractionation, progressive melt loss and bulk composition variations in anatectic metabasites: complications for interpreting the geodynamic significance of TTGs. Geoscience Frontiers, 11(3), 745-763.,Palin, R. M., White, R. W., Green, E. C., Diener, J. F., Powell, R., & Holland, T. J. (2016). High‐grade metamorphism and partial melting of basic and in…
M	Basalt	High-Al basalt from Baker & Eggler, 1983	NCKFMASHTOCr	Holland, T. J., Green, E. C., & Powell, R. (2018). Melting of peridotites through to granites: a simple thermodynamic model in the system KNCFMASHTOCr. Journal of Petrology, 59(5), 881-900.

## Sheet: G49288
Tamblyn, R., et al., 2021, Mantle heating at ca. 2 Ga by continental insulation: Evidence from granites and eclogites: Geology, https://doi.org/10.1130/G49288.1
